# Supplementary material for: Single-layer graphene oxide sheet: a novel substrate for dip-pen nanolithography
Source: Royal Society of Chemistry journal article supplement (doi:10.1039/c1cc12648b), 2011-01-01
Supplement: c1cc12648b.pdf [file c1cc12648b.pdf]

## Supporting Information

# Single-Layer Graphene Oxide Sheet: A Novel Substrate for Dip-Pen Nanolithography

*Hai Li,<sup>†,¶</sup> Xiehong Cao,<sup>†,¶</sup> Bing Li,<sup>†</sup> Xiaozhu Zhou,<sup>†</sup> Gang Lu,<sup>†</sup> Cipto Liusman,<sup>†</sup> Qiyuan He,<sup>†</sup> Freddy Boey,<sup>†,‡</sup> Subbu S. Venkatraman,<sup>†</sup> and Hua Zhang<sup>†,‡,\*</sup>*

<sup>†</sup> School of Materials Science and Engineering, Nanyang Technological University, 50 Nanyang Avenue, Singapore 639798, Singapore

<sup>‡</sup> Centre for Biomimetic Sensor Science, Nanyang Technological University, 50 Nanyang Drive, Singapore 639798, Singapore

<sup>¶</sup>These authors contributed equally to this work.

\*Author to whom correspondence should be addressed. Tel: +65-67905175, Fax: +65-67909081. E-mail: [h Zhang@ntu.edu.sg](mailto:h Zhang@ntu.edu.sg), [h Zhang166@yahoo.com](mailto:h Zhang166@yahoo.com). Website: <http://www.ntu.edu.sg/home/h Zhang/>.

In order to characterize the CNTs grown on GO, the following experiments were carried out. The GO substrate was prepared by adsorption of GO sheets on (3-aminopropyl) - triethoxysilane (APTES)-modified  $\text{SiO}_2$  substrate. After 0.2 mM  $\text{CoCl}_2$  methanolic solution was spin-coated on the prepared GO substrate at 2,000 rpm, the substrate was subjected to the same CVD conditions as mentioned in the main text. TEM sample was prepared by a polymer transfer technique.<sup>[1]</sup> By using this transfer technique, it is easy to distinguish the areas with or without rGO based on the typical selected area of electron diffraction (SAED) pattern of rGO in TEM.

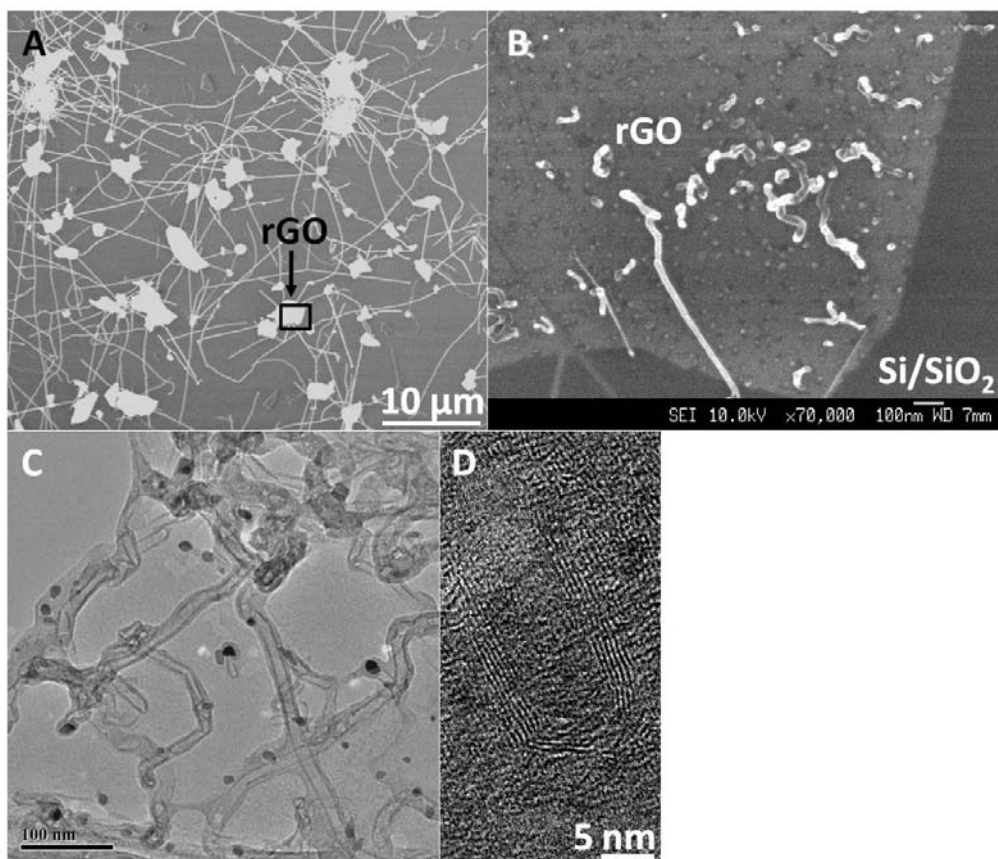

**Figure S1.** (A) SEM image shows lots of SWCNTs grew on  $\text{SiO}_2$ , which were catalyzed by Co NPs obtained by reduction of the spin-coated  $\text{CoCl}_2$ . (B) Magnified SEM image of the box shown in (A). Some fiber-like structures were observed on rGO. (C) TEM and

(D) HRTEM images of fiber-like structures, confirming that those fiber-like structures are MWCNTs with a diameter of ~ 15 nm.

**Reference:**

- [1] A. Reina, H. Son, L. Jiao, B. Fan, M. S. Dresselhaus, Z. Liu, J. Kong, *J. Phys. Chem. C* **2008**, *112*, 17741.
